# Supplementary material for: A Model for How Signal Duration Can Determine Distinct Outcomes of Gene Transcription Programs
Source: PLoS One. 2012 Mar 13;7(3):e33018. doi: 10.1371/journal.pone.0033018 (PMC3302786; doi:10.1371/journal.pone.0033018)
Supplement: Table S2 — Table of parameters used in Model 2. This is the model where transcription factors do not dissociate after a transcriptional event. The parameters were selected in order to clearly demonstrate the phenomena of interest (i.e. I dominates transcription for transient signals while A dominates for sustained signals). (DOC) [file pone.0033018.s009.doc]

| kon,T,A | 0.015 molec-1 min-1 | ktrx,I,A | 0 min-1 |
| --- | --- | --- | --- |
| kon,I,I | 0.015 molec-1 min-1 | ktrl,I | 1.0 min-1 |
| kon,A,I | 0.015 molec-1 min-1 | ktrl,A | 1.0 min-1 |
| koff,T,I | 0.5 min-1 | kdeg,T | 0-10 min-1 |
| koff,T,A | 0.5 min-1 | kdeg | 0.01 min-1 |
| koff,I,I | 0.5 min-1 | kdeg,m | 0.01 min-1 |
| bkoff,A,I | 0.5 min-1 | pSTAT3o | 100 molec. |
| ktrx,I,T | 1.0 min-1 | Ig | 2 molec. |
| ktrx,A,T | 1.0 min-1 | Ag | 2 molec. |

**Table S2. Table of parameters used in Model 2.** This is the model where transcription factors do not dissociate after a transcriptional event. The parameters were selected in order to clearly demonstrate the phenomena of interest (i.e. I dominates transcription for transient signals while A dominates for sustained signals).
